# Supplementary material
Source: PubMed Central journal article supplement (PMC7225066)
Supplement: NIHMS1557619-supplement-3.pdf [file NIHMS1557619-supplement-3.pdf]

**Supplemental TABLE. HDX data summary and list of experimental parameters**

|                                          |                                                                                          |                                                                                                                    |                                                                                                                                                         |
|------------------------------------------|------------------------------------------------------------------------------------------|--------------------------------------------------------------------------------------------------------------------|---------------------------------------------------------------------------------------------------------------------------------------------------------|
| <b>Data Set</b>                          | Fixed lipoprotein size.<br>1:10 particles SAA-POPC (8-10 nm in size)                     |                                                                                                                    | Lipoprotein size comparison                                                                                                                             |
| <b>States analyzed</b>                   | State 1: SAA alone<br>State 2: SAA-POPC (5 °C)                                           | State 3: SAA alone (15 °C)<br>State 4: SAA-POPC (15 °C)<br>State 5: SAA alone (25 °C)<br>State 6: SAA-POPC (25 °C) | State 7: 1:10 SAA-POPC (5 °C) (8-10 nm in size)<br>State 8: 1:30 SAA-POPC (5 °C) (11-17 nm in size)<br>State 9: 1:80 SAA POPC (5 °C) (18-25 nm in size) |
| <b>HDX reaction details <sup>a</sup></b> | Final D <sub>2</sub> O concentration = 94.6%, pH <sub>read</sub> = 7.1                   |                                                                                                                    |                                                                                                                                                         |
| <b>HDX time course</b>                   | 0.083, 0.167, 3,<br>10, 30, 60, 240 minutes                                              | 0.167, 1, 10, 60, 240 minutes                                                                                      | 0.25, 2, 10, 60 minutes                                                                                                                                 |
| <b>HDX controls</b>                      | 12 undeuterated controls,<br>6 for each state                                            | 12 undeuterated controls,<br>3 for each state                                                                      | 6 undeuterated controls,<br>2 for each state                                                                                                            |
| <b>Back-exchange</b>                     | 30-35%                                                                                   |                                                                                                                    |                                                                                                                                                         |
| <b>Number of peptides</b>                | 33 followed; 42 identified                                                               | 33 followed; 35 identified                                                                                         | 12 followed; 17 identified                                                                                                                              |
| <b>Filtering parameters</b>              | 0.2 products per a.a.,<br>2 consecutive products,<br>10ppm error,<br>file threshold of 7 | 0.2 products per a.a.,<br>2 consecutive products,<br>10ppm error,<br>file threshold of 6                           | 0.2 products per a.a.,<br>2 consecutive products,<br>10ppm error,<br>file threshold of 6                                                                |
| <b>Sequence coverage</b>                 | 95.1%                                                                                    | 100.0%                                                                                                             | 95.1%                                                                                                                                                   |
| <b>Average peptide length</b>            | 14.8                                                                                     | 15.4                                                                                                               | 20.3                                                                                                                                                    |
| <b>Redundancy</b>                        | 5.00                                                                                     | 4.93                                                                                                               | 2.48                                                                                                                                                    |
| <b>Replicates</b>                        | 4 total per state:<br>2 biological; 2 technical                                          | 1 technical for each state                                                                                         | 1 technical for each state                                                                                                                              |
| <b>Repeatability</b>                     | +/- 0.30 relative Da                                                                     |                                                                                                                    |                                                                                                                                                         |
| <b>Significant differences</b>           | > 0.8 Da                                                                                 |                                                                                                                    |                                                                                                                                                         |

<sup>a</sup> 18-fold dilution with labeling buffer [10 mM sodium phosphate, pD 7.5, 99.9% D<sub>2</sub>O].  
1:1 (v/v) dilution with quench buffer [150 mM sodium phosphate, pH 2.3, H<sub>2</sub>O].
